# Supplementary material for: Five isomers of monomeric cytosine and their interconversions induced by tunable UV laser light
Source: Royal Society of Chemistry journal article supplement (doi:10.1039/c0cp02812f), 2011-01-01
Supplement: c0cp02812f.pdf [file c0cp02812f.pdf]

# **Five isomers of monomeric cytosine and their interconversions induced by tunable UV laser light.**

## **Electronic Supplementary Information**

Leszek Lapinski, Igor Reva, Maciej J. Nowak, Rui Fausto

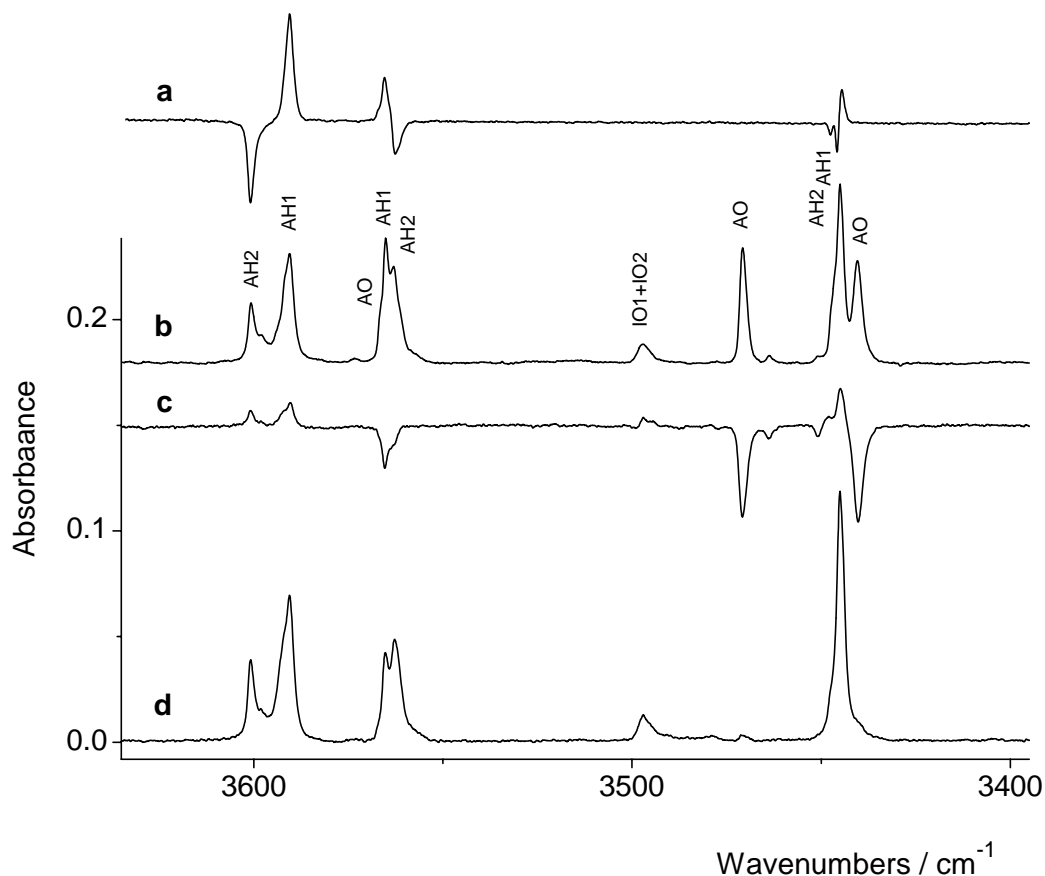

**Figure S1.** Fragment of the infrared spectrum of cytosine monomers isolated in an Ar matrix: **(b)** recorded after deposition of the matrix; **(d)** recorded after irradiation of the matrix with UV ( $\lambda = 300$  nm) monochromatic laser light; **(c)** subtraction result: spectrum **d** recorded after irradiation at 300 nm, minus spectrum **b** recorded after deposition of the matrix; **(a)** subtraction result: the spectrum recorded after irradiation with monochromatic NIR 7034  $\text{cm}^{-1}$  laser light, minus the spectrum recorded after irradiation with monochromatic NIR 7013  $\text{cm}^{-1}$  laser light; The spectrum presented in trace **a** was obtained in a separate experiment. [Lapinski, L.; Nowak, M. J.; Reva, I.; Rostkowska, H.; Fausto, R. *Phys. Chem. Chem. Phys.* **2010**, *12*, 9615 - 9618.]

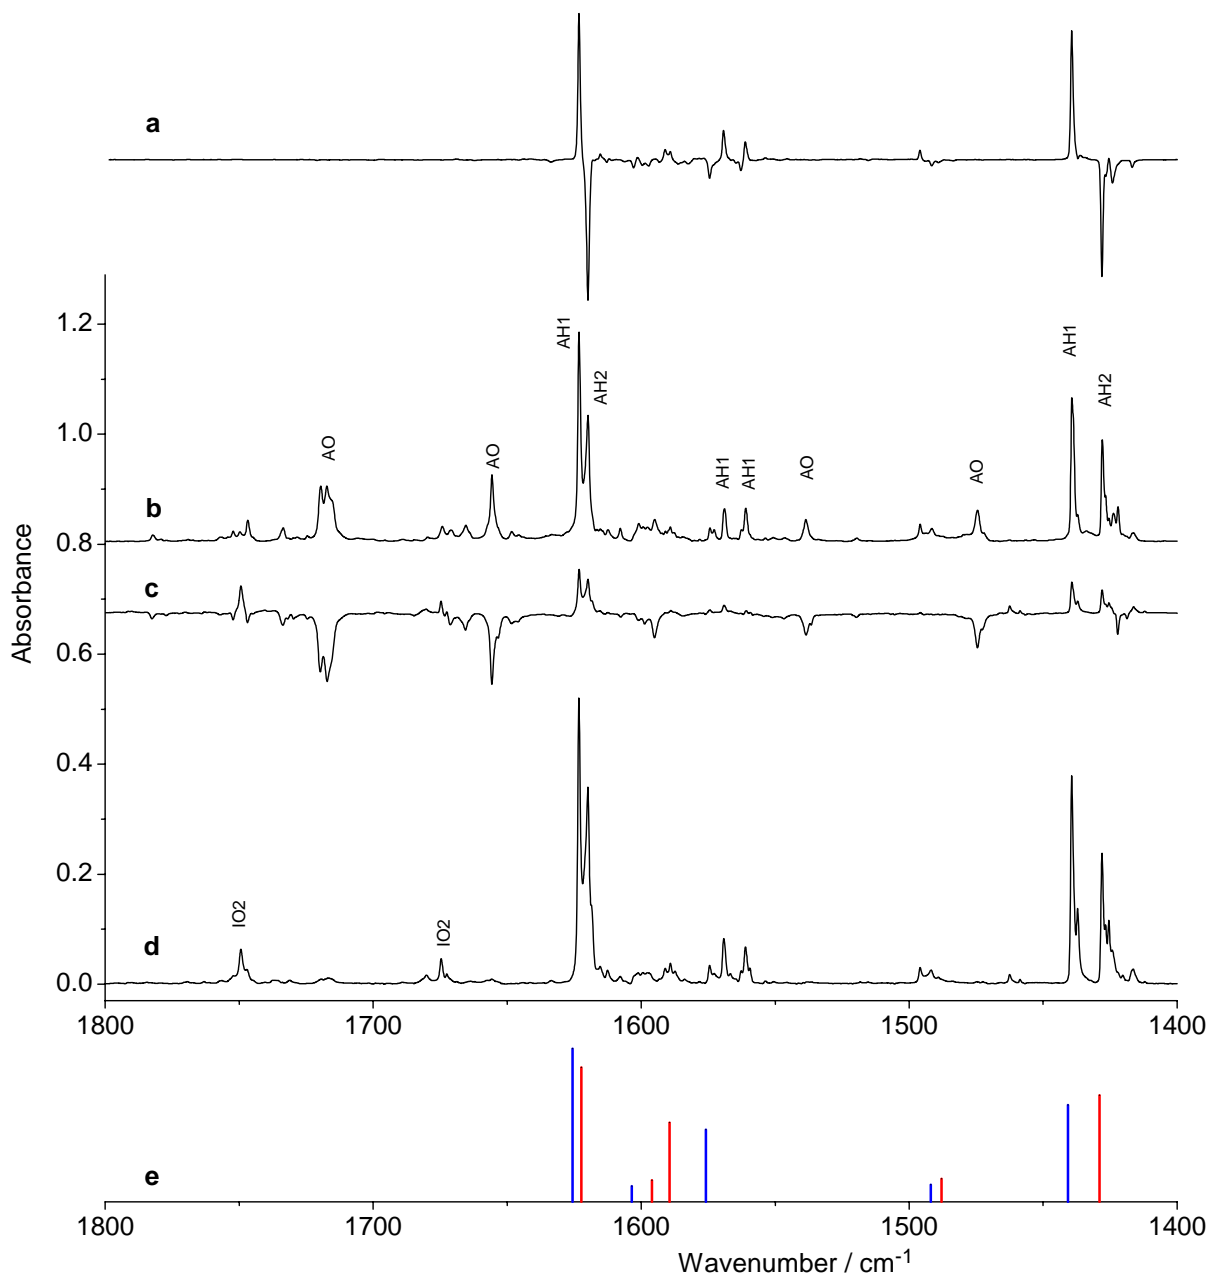

**Figure S2.** Fragment of the infrared spectrum of cytosine monomers isolated in an Ar matrix: **(b)** recorded after deposition of the matrix; **(d)** recorded after irradiation of the matrix with UV ( $\lambda = 300$  nm) monochromatic laser light; **(c)** subtraction result: spectrum **d** recorded after irradiation at 300 nm, minus spectrum **b** recorded after deposition of the matrix; **(a)** subtraction result: the spectrum recorded after irradiation with monochromatic NIR  $7034\text{ cm}^{-1}$  laser light, minus the spectrum recorded after irradiation with monochromatic NIR  $7013\text{ cm}^{-1}$  laser light; The spectrum presented in trace **a** was obtained in a separate experiment. [Lapinski, L.; Nowak, M. J.; Reva, I.; Rostkowska, H.; Fausto, R. *Phys. Chem. Chem. Phys.* **2010**, *12*, 9615 - 9618.] **(e)** theoretical spectra calculated at the DFT(B3LYP)/6-31++G(d,p) level for: (blue) **AH1** and (red) **AH2** forms of cytosine. Theoretical wavenumbers were scaled by 0.978.

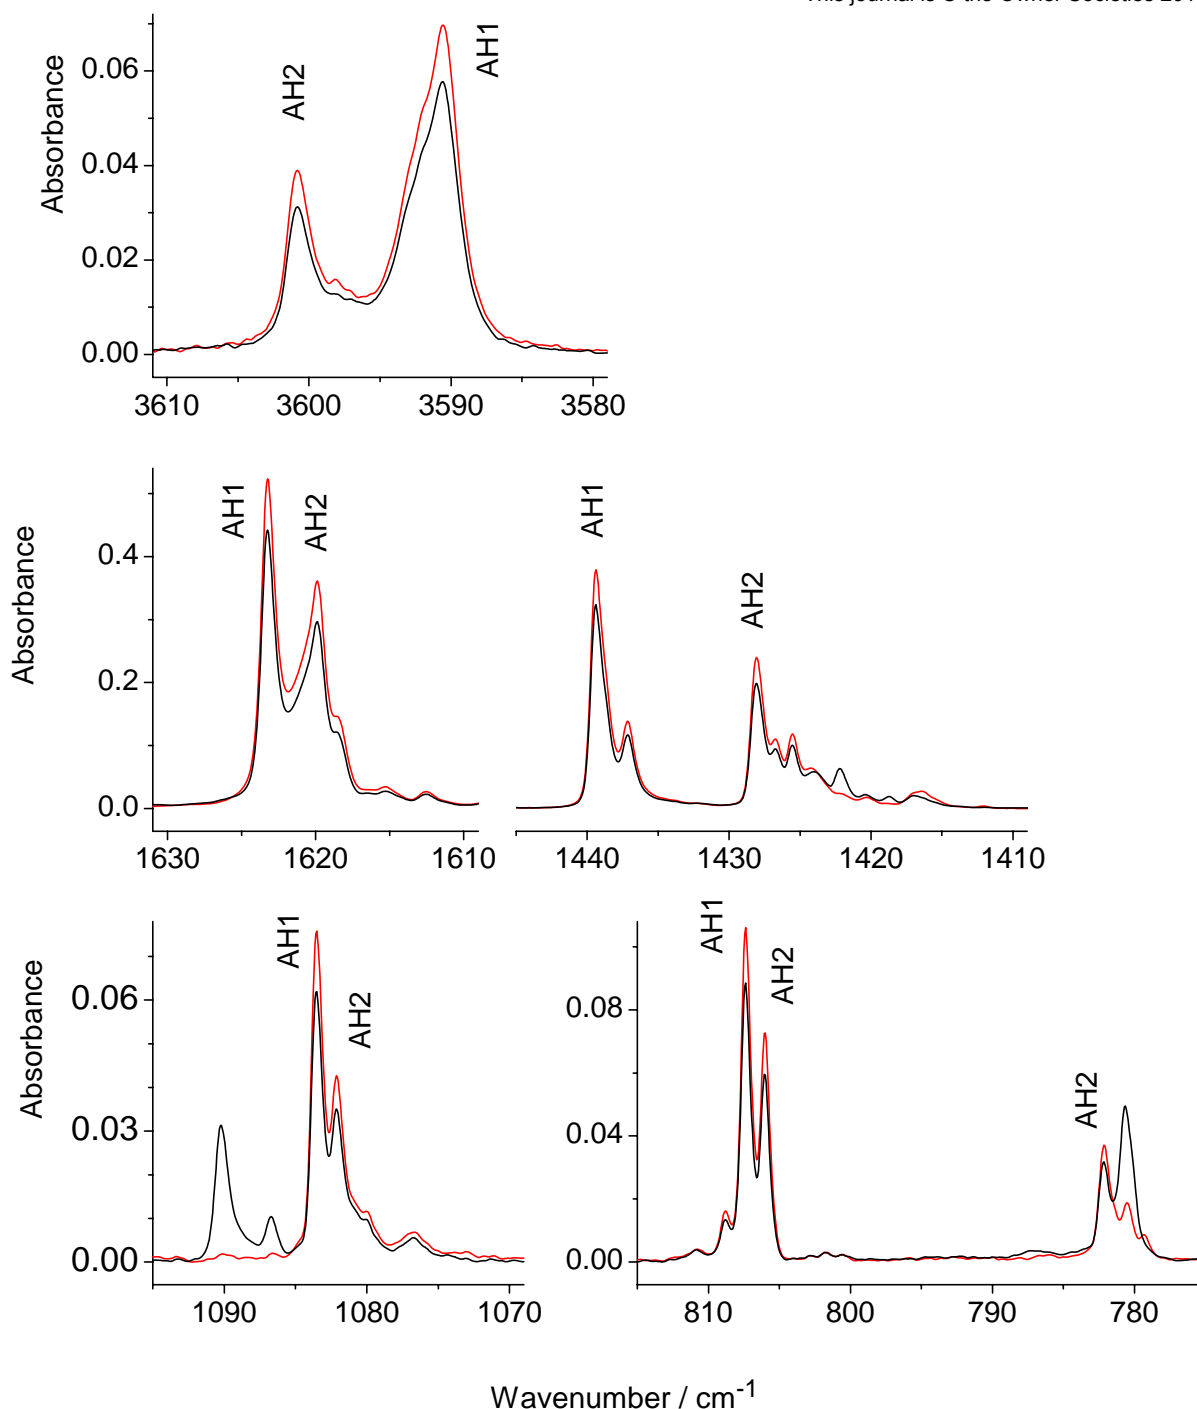

**Figure S3.** Spectral indications of the oxo $\rightarrow$ hydroxy phototautomeric reaction converting the **AO** tautomer into **AH1** and **AH2** forms. Fragments of the infrared spectrum of cytosine monomers isolated in an Ar matrix: (black) recorded after deposition of the matrix; (red) recorded after irradiation of the matrix with UV ( $\lambda = 300$  nm) monochromatic laser light. The bands marked as **AH1** and **AH2** were attributed to these forms on the basis of their behavior upon NIR irradiations at  $7034$   $\text{cm}^{-1}$  and at  $7013$   $\text{cm}^{-1}$  (see Ref [Lapinski, L.; Nowak, M. J.; Reva, I.; Rostkowska, H.; Fausto, R. *Phys. Chem. Chem. Phys.* **2010**, *12*, 9615 - 9618.] and Figures S1, S2 in the **ESI** of the current paper).

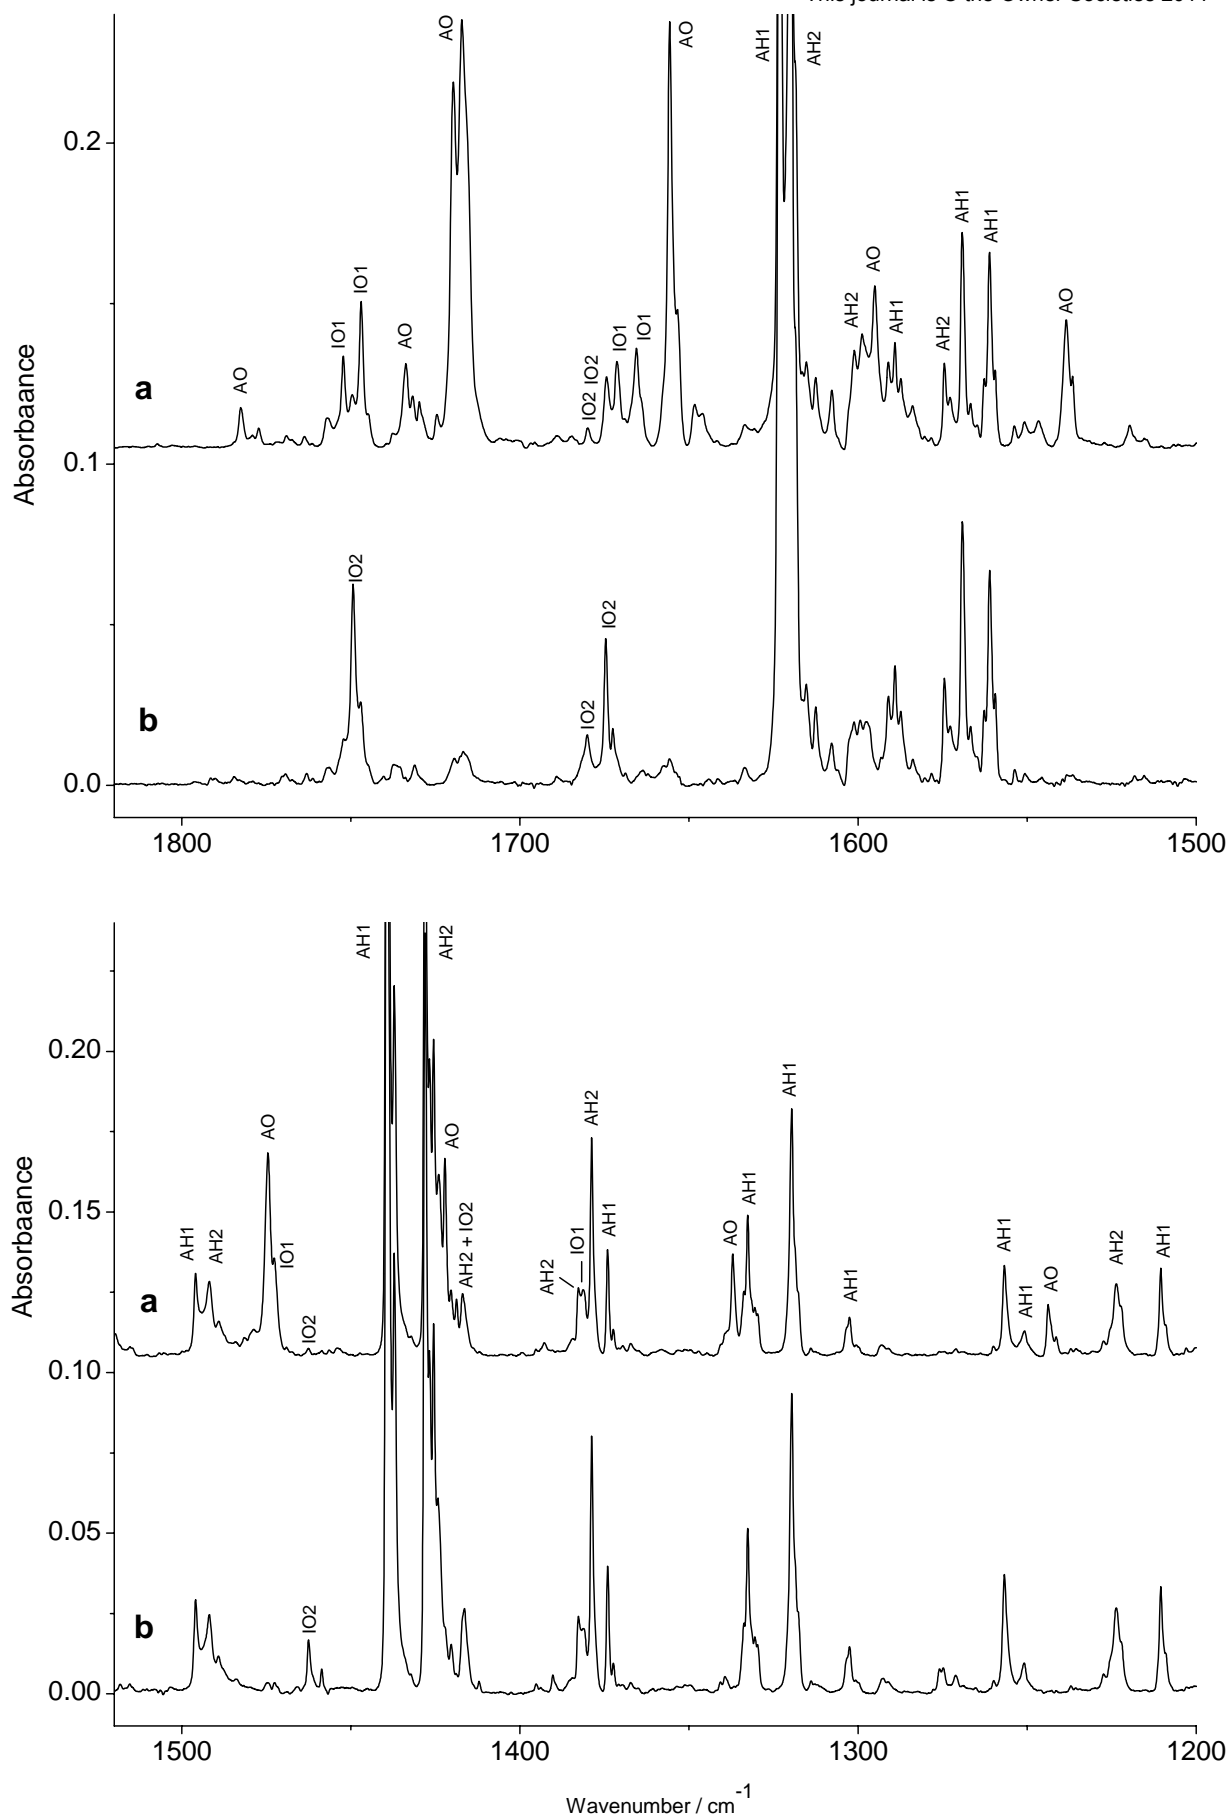

Figure S4 (part 1).

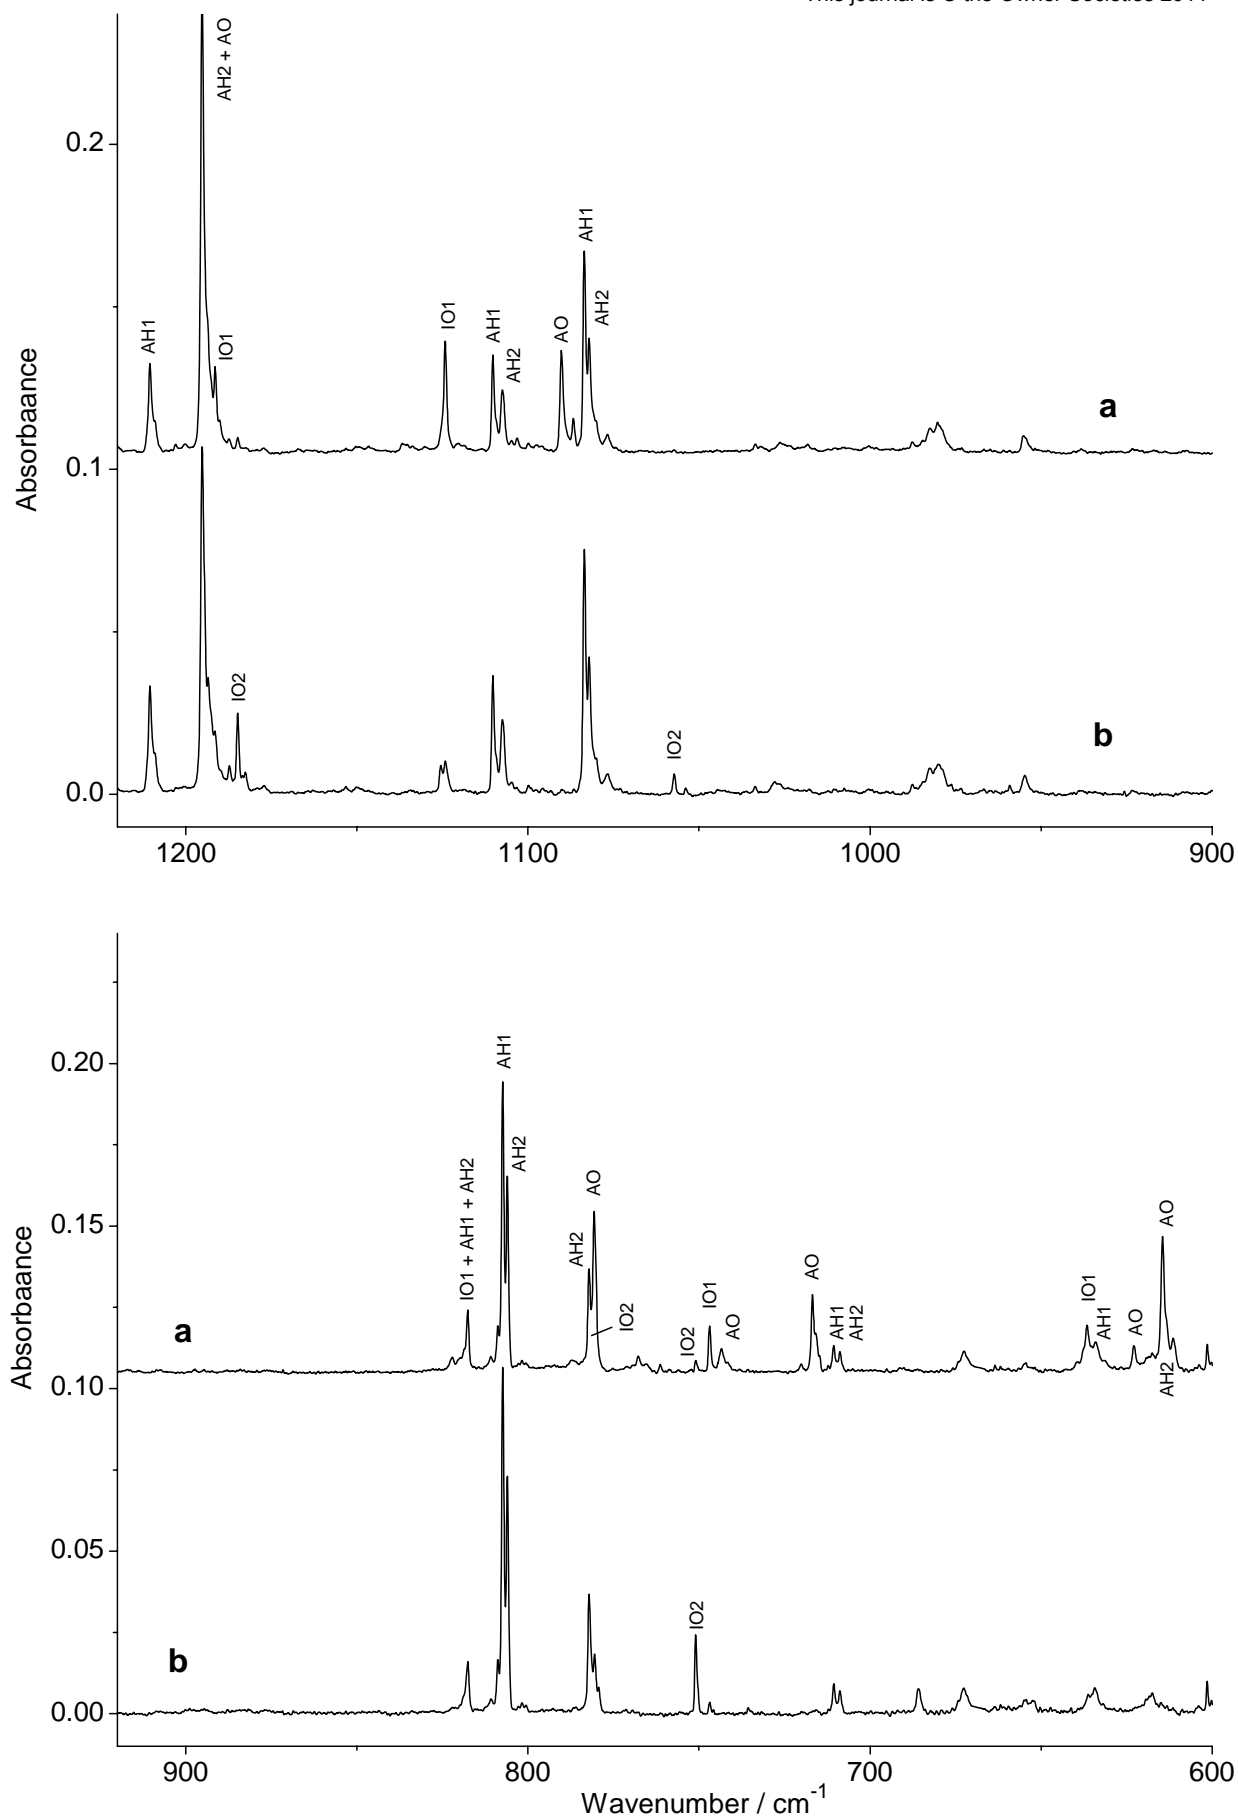

Figure S4 (part 2).

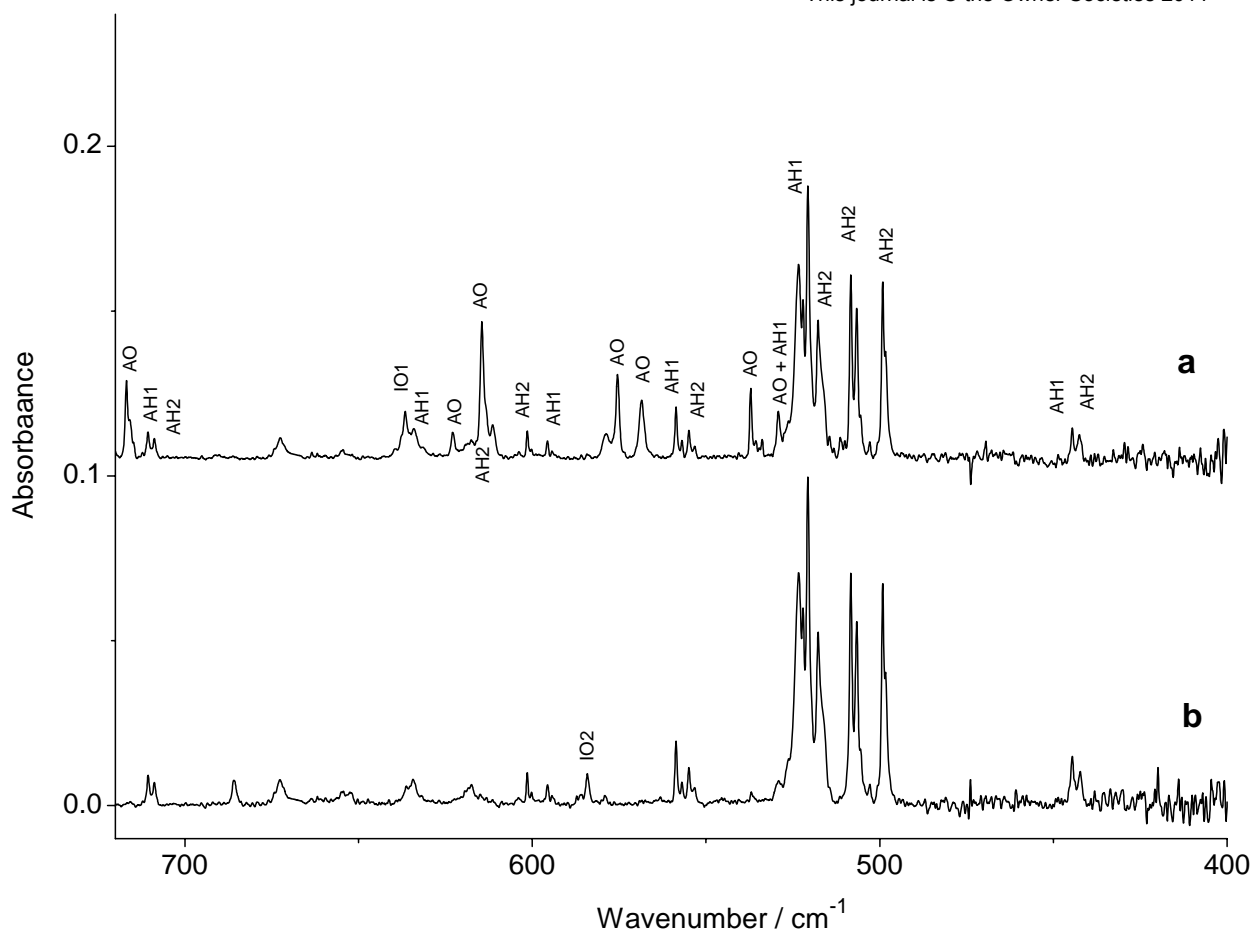

**Figure S4 (part 3).**

Infrared spectrum of cytosine monomers isolated in an Ar matrix: (a) recorded after deposition of the matrix; (b) recorded after irradiation of the matrix with UV ( $\lambda = 300$  nm) monochromatic laser light; The bands were attributed to the particular **AH1**, **AH2**, **AO**, **IO1** or **IO2** forms on the basis of their intensity changes occurring upon UV and NIR irradiations (see detailed description in the text).

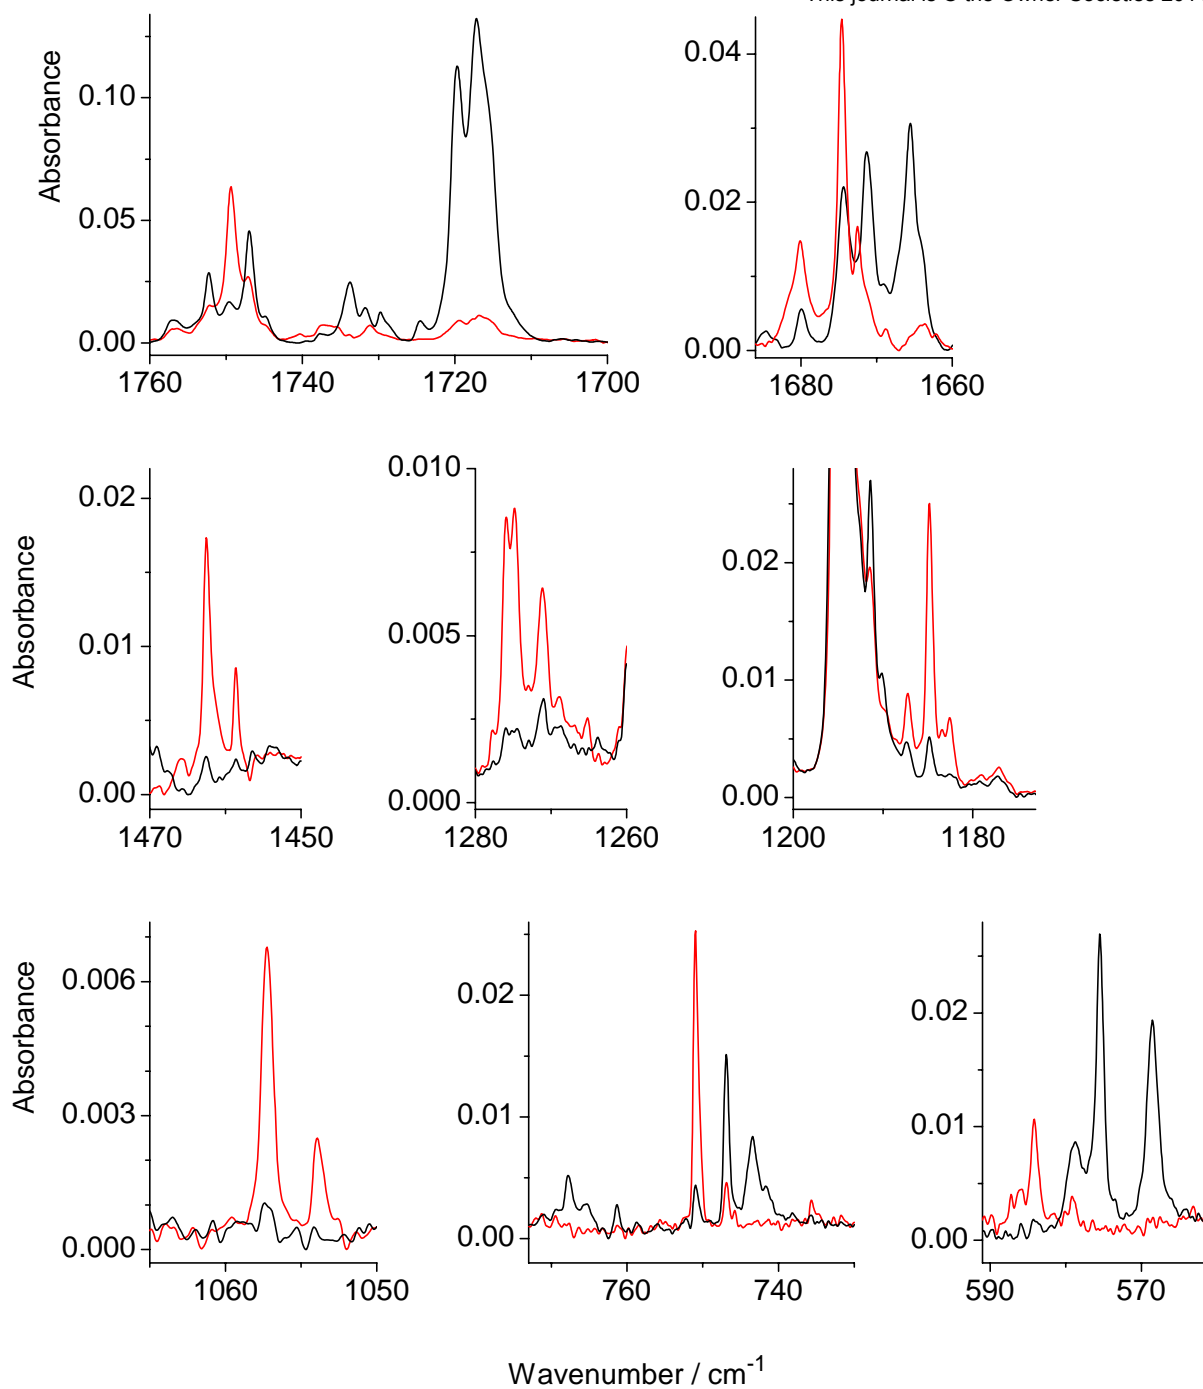

**Figure S5.** IR bands in the spectrum of **IO2** form increasing upon **IO1**→**IO2** conversion induced by UV ( $\lambda = 300$  nm) monochromatic laser light. Fragments of the infrared spectrum of cytosine monomers isolated in an Ar matrix: (black) recorded after deposition of the matrix; (red) recorded after irradiation of the matrix with UV ( $\lambda = 300$  nm) monochromatic laser light.



**Table S1**

IR bands observed in the spectrum of cytosine isolated in an Ar matrix and their assignment to **AH1**, **AH2**, **AO**, **IO1** or **IO2** forms of the compound.

| wavenumber       | integrated intensity | assignment to the isomeric form |
|------------------|----------------------|---------------------------------|
| cm <sup>-1</sup> | arbitrary units      |                                 |
| 3600.6           | 0.110                | <b>AH2</b>                      |
| 3590.3           | 0.266                | <b>AH1</b>                      |
| 3565.1           | 0.160                | <b>AH1, AO</b>                  |
| 3562.7           | 0.180                | <b>AH2, AO</b>                  |
| 3497.2           | 0.037                | <b>IO1, IO2</b>                 |
| 3470.8           | 0.140                | <b>AO</b>                       |
| 3463.8           | 0.009                | <b>AO</b>                       |
| 3450.8           | 0.009                | <b>AH1, AH2</b>                 |
| 3444.8           | 0.315                |                                 |
| 3440.3           | 0.180                | <b>AO</b>                       |
| 1782.6           | 0.023                | <b>AO</b>                       |
| 1756.8           | 0.020                | <b>IO1</b>                      |
| 1752.3           | 0.057                | <b>IO1</b>                      |
| 1749.2           | 0.030                | <b>IO2</b>                      |
| 1746.9           | 0.105                | <b>IO1</b>                      |
| 1733.8           | 0.114                | <b>AO</b>                       |
| 1731.8           |                      |                                 |
| 1729.6           |                      |                                 |
| 1719.7           | 0.749                | <b>AO</b>                       |
| 1717.1           |                      |                                 |
| 1680.2           | 0.008                | <b>IO2</b>                      |
| 1674.4           | 0.041                | <b>IO2</b>                      |
| 1671.2           | 0.071                | <b>IO1</b>                      |
| 1665.7           | 0.100                | <b>AO</b>                       |
| 1655.7           | 0.345                | <b>AO</b>                       |
| 1648.1           | 0.055                | <b>AO</b>                       |
| 1623.3           | 0.943                | <b>AH1</b>                      |
| 1620.0           | 0.687                | <b>AH2</b>                      |
| 1607.7           | 0.035                |                                 |
| 1601.0           | 0.056                | <b>AH2</b>                      |
| 1598.7           | 0.144                | <b>AO, AH2</b>                  |
| 1595.0           | 0.214                | <b>AO</b>                       |
| 1591.0           | 0.140                | <b>AH1</b>                      |
| 1589.2           |                      |                                 |
| 1574.3           | 0.066                | <b>AH2</b>                      |
| 1569.2           | 0.138                | <b>AH1</b>                      |
| 1561.1           | 0.139                | <b>AH1</b>                      |
| 1553.8           | 0.012                | <b>AH1</b>                      |
| 1550.8           | 0.048                | <b>AO</b>                       |
| 1546.5           |                      |                                 |
| 1538.4           | 0.126                | <b>AO</b>                       |
| 1519.7           | 0.020                | <b>AO</b>                       |
| 1495.8           | 0.050                | <b>AH1</b>                      |
| 1491.7           | 0.050                | <b>AH2</b>                      |
| 1474.5           | 0.135                | <b>AO</b>                       |
| 1472.6           | 0.024                | <b>IO1</b>                      |

|        |        |                      |
|--------|--------|----------------------|
| 1462.5 | 0.004  | <b>IO2</b>           |
| 1439.6 | 0.602  | <b>AH1</b>           |
| 1437.2 |        |                      |
| 1428.0 | 0.400  | <b>AH2</b>           |
| 1425.5 |        |                      |
| 1422.2 | 0.072  | <b>AO</b>            |
| 1416.9 | 0.019  | <b>AH2, IO2</b>      |
| 1382.7 | 0.036  | <b>AH2</b>           |
| 1381.0 | 0.010  | <b>IO1</b>           |
| 1378.7 | 0.100  | <b>AH2</b>           |
| 1374.0 | 0.044  | <b>AH1</b>           |
| 1338.0 | 0.012  | <b>AH2</b>           |
| 1337.0 | 0.055  | <b>AO</b>            |
| 1332.0 | 0.095  | <b>AH1</b>           |
| 1319.6 | 0.156  | <b>AH1</b>           |
| 1302.8 | 0.025  | <b>AH1</b>           |
| 1275.3 | 0.003  | <b>IO2</b>           |
| 1259.8 | 0.005  | <b>AH2</b>           |
| 1256.7 | 0.054  | <b>AH1</b>           |
| 1250.8 | 0.013  | <b>AH1</b>           |
| 1243.7 | 0.033  | <b>AO</b>            |
| 1223.6 | 0.082  | <b>AH2</b>           |
| 1210.5 | 0.048  | <b>AH1</b>           |
| 1195.2 | 0.210  | <b>AH2, AO</b>       |
| 1191.4 | 0.015  | <b>IO1</b>           |
| 1184.8 | 0.005  | <b>IO2</b>           |
| 1124.2 | 0.050  | <b>IO1</b>           |
| 1110.2 | 0.038  | <b>AH1</b>           |
| 1107.3 | 0.030  | <b>AH2</b>           |
| 1090.1 | 0.049  | <b>AO</b>            |
| 1083.5 | 0.069  | <b>AH1</b>           |
| 1082.1 | 0.051  | <b>AH2</b>           |
| 1076.9 | 0.013  | <b>AH1</b>           |
| 1053.3 | 0.001  | <b>IO2</b>           |
| 981.0  | 0.025  | <b>AH1</b>           |
| 954.9  | 0.010  | <b>AH1</b>           |
| 817.6  | 0.026  | <b>IO1, AH1, AH2</b> |
| 807.3  | 0.080  | <b>AH1</b>           |
| 805.9  | 0.069  | <b>AH2</b>           |
| 782.1  | 0.026  | <b>AH2</b>           |
| 780.6  | 0.072  | <b>AO, IO2</b>       |
| 767.6  | 0.005  | <b>AO</b>            |
| 750.8  | 0.004  | <b>IO2</b>           |
| 746.9  | 0.014  | <b>IO1</b>           |
| 743.4  | 0.0163 | <b>AO</b>            |
| 720.0  | 0.003  | <b>AO</b>            |
| 716.8  | 0.038  | <b>AO</b>            |
| 710.6  | 0.009  | <b>AH1</b>           |
| 708.8  | 0.008  | <b>AH2</b>           |
| 685.9  | 0.001  | <b>IO2</b>           |
| 636.6  | 0.031  | <b>IO1</b>           |

|       |       |            |
|-------|-------|------------|
| 633.9 | 0.016 | <b>AH1</b> |
| 622.8 | 0.014 | <b>AO</b>  |
| 617.9 | 0.006 | <b>AH2</b> |
| 614.5 | 0.070 | <b>AO</b>  |
| 601.3 | 0.010 | <b>AH2</b> |
| 595.6 | 0.005 | <b>AH1</b> |
| 584.2 | 0.001 | <b>IO2</b> |
| 578.8 | 0.059 | <b>AO</b>  |
| 575.5 |       |            |
| 568.5 | 0.038 | <b>AO</b>  |
| 558.6 | 0.017 | <b>AH1</b> |
| 554.9 | 0.009 | <b>AH2</b> |

|       |       |                |
|-------|-------|----------------|
| 537.2 | 0.022 | <b>AO</b>      |
| 529.2 | 0.017 | <b>AO, AH1</b> |
| 527.0 | 0.292 | <b>AH1</b>     |
| 523.3 |       |                |
| 520.3 |       |                |
| 517.6 | 0.157 | <b>AH2</b>     |
| 508.4 | 0.127 | <b>AH2</b>     |
| 506.6 |       |                |
| 499.0 | 0.088 | <b>AH2</b>     |
| 444.6 | 0.013 | <b>AH1</b>     |
| 442.5 | 0.012 | <b>AH2</b>     |

The wavenumber of the strongest component of multiplet band is underline.
